# Supplementary material for: Dual Drug-Loaded Nanoliposomes Encapsulating Curcumin and 5-Fluorouracil with Advanced Medicinal Applications: Self-Monitoring and Antitumor Therapy
Source: MDPI journal article supplement (doi:10.3390/molecules28114353), 2023-05-25
Supplement: s1 [file s1]

**Table S1.** The particle size, zeta potential and PDI results of liposomes

|           | particle size (nm) | PDI (%) | zeta potential (mV) |
|-----------|--------------------|---------|---------------------|
| Empty-Lip | 64.5 ± 4.96        | 0.25    | -15.2 ± 1.1         |
| FC-DP-Lip | 92.60 ± 0.88       | 0.23    | -36.0 ± 2.6         |

**Table S2.** The IC<sub>50</sub> values of FC-DP-Lip and 5-FU in HT-29, HCT-116 and HGC-27 cell lines in vitro (μg/mL)

|           | HT-29 | HCT-116 | HGC-27 |
|-----------|-------|---------|--------|
| FC-DP-Lip | 5.03  | 12.53   | 2.90   |
| 5-FU      | 17.42 | 23.73   | 5.01   |

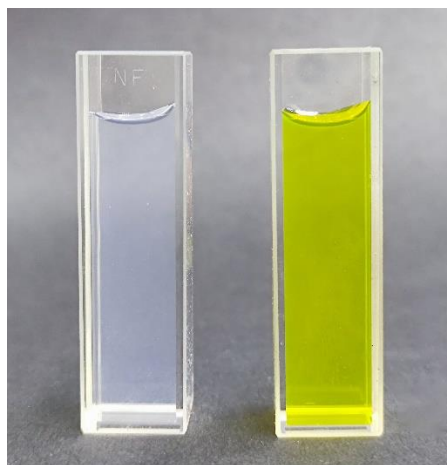

**Figure S1.** Optical photograph of the appearance of Empty-Lip (left) and FC-DP-Lip (right).

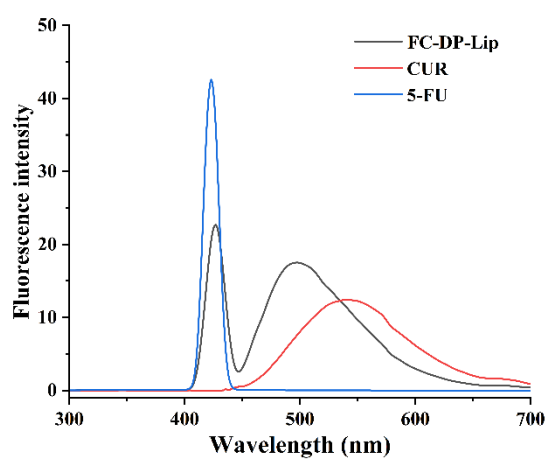

**Figure S2.** Fluorescence emission spectra of 5-FU, CUR and FC-DP-Lip

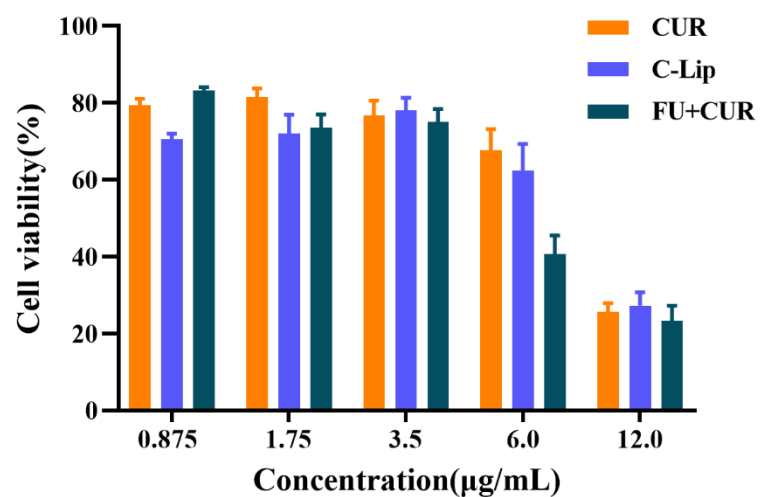

**Figure S3.** In vitro cytotoxicity results of CUR, C-Lip and 5-FU on HCT-116 (n=3). The administered concentrations were calculated based on CUR content. Bar indicate means  $\pm$  SD.
